# Supplementary material
Source: Royal Society of Chemistry journal article supplement (doi:10.1039/d6ja00044d)
Supplement: d6ja00044d1.pdf [file d6ja00044d1.pdf]

Supporting information:

**Comparison and optimization of chromatographic separation  
methods for accurate measurement of antimony isotopic composition**

Jianfeng Liu,<sup>a</sup> Shengliu Yuan,<sup>b</sup> Wengang Liu,<sup>ac</sup> Wang Zheng,<sup>a</sup> Hongming Cai,<sup>a</sup>  
Wei Yuan,<sup>a</sup> Jiubin Chen<sup>\*a</sup>

<sup>a</sup> School of Earth System Science, Institute of Surface-Earth System Science, Tianjin University, Tianjin300072, China

<sup>b</sup> College of Marine and Environmental Sciences, Tianjin University of Science and Technology, Tianjin 300457, China

<sup>c</sup> Tianjin Center, China Geological Survey (North China Center for Geoscience Innovation), Tianjin, 300170, China

\*Corresponding author, E-mail: [jbchen@tju.edu.cn](mailto:jbchen@tju.edu.cn) (Jiubin Chen)

Table S1. Existing chromatographic separation strategies for Sb purification and isotope measurement

| Reference                                                                               | Sorbent used for Sb purification              |                                              | Yield (%)         | Antimony isotope analysis by MC-ICP-MS |                            |                    |                     |
|-----------------------------------------------------------------------------------------|-----------------------------------------------|----------------------------------------------|-------------------|----------------------------------------|----------------------------|--------------------|---------------------|
|                                                                                         | Step 1                                        | Step 2                                       |                   | Method of mass bias correction         | Sample introduction system |                    | Precision (%o, 2SD) |
|                                                                                         |                                               |                                              |                   |                                        | Sb                         | Doping element     |                     |
| Rouxel <i>et al.</i> (2003) <sup>1</sup>                                                | Bio-Rad AG 50-X8 resin                        | Thiol cotton fiber (TCF)                     | —                 | SSB                                    | HG                         | —                  | 0.04                |
| Asaoka <i>et al.</i> (2011) <sup>2</sup>                                                | TCF                                           | —                                            | 99.5± 3.6         | RRL (Sn doping)                        | —                          | —                  | 0.04                |
| Tanimizu <i>et al.</i> (2011) <sup>3</sup>                                              | TCF                                           | —                                            | —                 | RRL (Sn doping)                        | NSC                        | NSC                | 0.04                |
| Lobo <i>et al.</i> (2012, 2013) <sup>4,5</sup>                                          | Dowex AG 50-X8 resin                          | Amberlite IRA 743 resin                      | >84               | SSB and RRL (In doping)                | NSC                        | NSC                | 0.02                |
| Resongles <i>et al.</i> (2015) <sup>6</sup>                                             | Thiol-cellulose powder (TCP)                  | —                                            | 96± 3             | SSB                                    | HG                         | —                  | 0.06                |
| Liu <i>et al.</i> (2020) <sup>7</sup>                                                   | AG 1-X4 resin                                 | AG 50W-X8 resin                              | 98.7± 5.6         | SSB and RRL (Cd doping)                | NSC                        | NSC                | 0.04                |
| Li <i>et al.</i> (2021) <sup>8</sup>                                                    | Thiol-silica resin (Cleaner SH)               | —                                            | >95.2             | SSB and RRL (In doping)                | Desolvation system         | Desolvation system | 0.04                |
| Ferrari <i>et al.</i> (2021) <sup>9</sup>                                               | Thiol-functionalized silica powder (TSP)      | —                                            | 100± 7            | SSB                                    | HG and SC                  | —                  | 0.05                |
| Sun <i>et al.</i> (2021) <sup>10</sup>                                                  | Bio-Rad AG 50w-X8 resin                       | Thiol-silica resin (Cleaner SH)              | 99.5± 4.1         | SSB and RRL (Cd doping)                | HG                         | Desolvation system | 0.04                |
| Kaufmann <i>et al.</i> (2021) <sup>11</sup>                                             | Dowex AG 50-X8 resin                          | Amberlite IRA 743 resin                      | —                 | SSB and RRL (Sn doping)                | NSC                        | NSC                | <0.06               |
| Fang <i>et al.</i> (2022) <sup>12</sup>                                                 | AG 50W-X8 resin                               | —                                            | 99.9 ± 2.8        | SSB and RRL (Sn doping)                | NSC                        | NSC                | 0.03                |
| Ferrari <i>et al.</i> (2023) <sup>13</sup>                                              | Thiol-functionalized silica powder (TSP)      | —                                            | >93               | SSB                                    | HG and SC                  | —                  | <0.06               |
| Veldhuizen <i>et al.</i> (2023) <sup>14</sup>                                           | Eichrom 1-X8 resin                            | —                                            | 100± 5            | SSB                                    | HG                         | —                  | 0.06                |
| Xia <i>et al.</i> (2023) <sup>15</sup>                                                  | Thiol-silica resin (Cleaner SH)               | —                                            | >94               | SSB and RRL (Cd doping)                | HG                         | Desolvation system | 0.04                |
| Li <i>et al.</i> (2024) <sup>16</sup>                                                   | Bio-Rad AG 50w-X8 resin                       | Thiol-silica resin (Cleaner SH)              | 100               | SSB and RRL (In doping)                | Desolvation system         | Desolvation system | 0.04                |
| Zhu <i>et al.</i> (2024) <sup>17</sup>                                                  | Bio-Rad AG 50w-X8 resin                       | thiol-functionalized mesoporous powder (TSP) | >95.6             | SSB and RRL (Cd doping)                | HG                         | Desolvation system | <0.09               |
| Chen <i>et al.</i> (2025) <sup>18</sup>                                                 | HPLC: Hamilton PRP-X100 anion-exchange column | —                                            | 103 ± 3<br>99 ± 1 | SSB and RRL (In doping)                | HG                         | Desolvation system | 0.05                |
| Kaufmann <i>et al.</i> (2025) <sup>19</sup>                                             | Bio-Rad AG MP-1 resin                         | Dowex AG 50-X8 (same resin for step 3)       | —                 | SSB and RRL (Sn doping)                | Desolvation system         | Desolvation system | <0.1                |
| Li <i>et al.</i> (2025) <sup>20</sup>                                                   | HG                                            | Thiol-silica resin (Cleaner SH)              | 100               | SSB and RRL (In doping)                | Desolvation system         | Desolvation system | <0.07               |
| Kaufmann <i>et al.</i> (2021) <sup>11</sup> and Wang <i>et al.</i> (2024) <sup>21</sup> | —                                             | —                                            | —                 | SSB and RRL (Sn doping)                | Laser-ablation             | NSC                | 0.06                |

The following abbreviations are used: standard-sample bracketing method (SSB), revised Russell's Law (RRL), hydride generation system (HG), spray chamber (SC), nebulizer and spray chamber (NSC), and High-Performance Liquid Chromatography (HPLC).

Table S2. Instrument settings and parameters for the HG-MC-ICPMS system

| Instrument and component                      | Parameters                                                                                                                                                                                     |
|-----------------------------------------------|------------------------------------------------------------------------------------------------------------------------------------------------------------------------------------------------|
| Nu Plasma III MC-ICP-MS                       |                                                                                                                                                                                                |
| Cup configuration                             | L5( <sup>111</sup> Cd), L4( <sup>113</sup> Cd), Ax( <sup>117</sup> Sn), H1( <sup>118</sup> Sn), H3( <sup>120</sup> Sn), H4( <sup>121</sup> Sb), H6( <sup>123</sup> Sb), H7( <sup>125</sup> Te) |
| Sample cone                                   | Nickel                                                                                                                                                                                         |
| Skimmer cone                                  | Nickel                                                                                                                                                                                         |
| RF power                                      | 1300 W                                                                                                                                                                                         |
| Resolution                                    | Low                                                                                                                                                                                            |
| Coolant gas (L min <sup>-1</sup> )            | 13                                                                                                                                                                                             |
| Auxiliary gas (L min <sup>-1</sup> )          | 1.2                                                                                                                                                                                            |
| Sample gas (L min <sup>-1</sup> )             | 0.02                                                                                                                                                                                           |
| Quad 1                                        | -27.9                                                                                                                                                                                          |
| Quad 2                                        | 200.3                                                                                                                                                                                          |
| Number of blocks                              | 1                                                                                                                                                                                              |
| Number of cycles                              | 30                                                                                                                                                                                             |
| Integration time per cycle                    | 10s                                                                                                                                                                                            |
| Aridus II: introduction of Cd                 |                                                                                                                                                                                                |
| PFA nebulizer                                 | 100 µL min <sup>-1</sup>                                                                                                                                                                       |
| Nebulizer gas (Psi)                           | 30                                                                                                                                                                                             |
| Sweep gas in Aridus II (L min <sup>-1</sup> ) | 2.66                                                                                                                                                                                           |
| Hydride generator: introduction of Sb         |                                                                                                                                                                                                |
| Flow rate of reductant                        | 0.5 mL min <sup>-1</sup>                                                                                                                                                                       |
| Flow rate of sample solution                  | 0.5 mL min <sup>-1</sup>                                                                                                                                                                       |
| Washing solution                              | 3 M HCl                                                                                                                                                                                        |

Table S3. The Sb recovery rates and difference between measured and reported  $\delta^{123}\text{Sb}$  values (expressed as  $\Delta^{123}\text{Sb} = |\delta^{123}\text{Sb}_{\text{measured}} - \delta^{123}\text{Sb}_{\text{reported}}|$ ) for geological samples before modification for Protocol 2

| Sample    | Recovery | Measured $\delta^{123}\text{Sb}$ value<br>(‰, $\pm 2\text{SD}$ , $n=3$ ) | Reported $\delta^{123}\text{Sb}$<br>value | $\Delta^{123}\text{Sb}$ |
|-----------|----------|--------------------------------------------------------------------------|-------------------------------------------|-------------------------|
| BCR-2     | 84.4%    | $0.03 \pm 0.02$                                                          | $0.26 \pm 0.04^{22}$                      | 0.23                    |
| BHVO-2    | 93.7%    | $0.13 \pm 0.04$                                                          | $-0.10 \pm 0.06^{19}$                     | 0.23                    |
| AGV-2     | 82.8%    | -0.03                                                                    | $0.23 \pm 0.11^{17}$                      | 0.26                    |
| GBW03104  | 80.2%    | -0.03                                                                    | $0.29 \pm 0.06^{10}$                      | 0.32                    |
| GSS-5     | 77.8%    | $-0.19 \pm 0.03$                                                         | $0.21 \pm 0.02^{10}$                      | 0.40                    |
| GSS-14    | 80.6%    | $-0.12 \pm 0.04$                                                         | $0.34 \pm 0.03^{10}$                      | 0.46                    |
| GSD-3a    | 86.6%    | $-0.06 \pm 0.04$                                                         | $0.20 \pm 0.07^{10}$                      | 0.26                    |
| GSD-11    | 84.8%    | $0.16 \pm 0.04$                                                          | $0.17 \pm 0.05^{10}$                      | 0.01                    |
| BCR-482   | 109.6%   | $0.17 \pm 0.01$                                                          | $0.20 \pm 0.05^{10}$                      | 0.03                    |
| GSB-11    | 99.7%    | $0.20 \pm 0.03$                                                          | $0.24 \pm 0.10^{17}$                      | 0.04                    |
| GSP-2     | 85.8%    | $-0.05 \pm 0.00$                                                         | —                                         | —                       |
| JG-2      | 100.3%   | $0.20 \pm 0.07$                                                          | —                                         | —                       |
| GBW07314  | 79.1%    | $-0.10 \pm 0.00$                                                         | —                                         | —                       |
| GBW07333  | 75.3%    | $0.02 \pm 0.01$                                                          | —                                         | —                       |
| Nist 2702 | 96.9%    | $-0.13 \pm 0.03$                                                         | —                                         | —                       |

Table S4. Sb recovery (%) for the analytical protocol using a final KI-AA concentration of 0.5% during reduction in 0.5 M HCl, together with sample loss on ignition (LOI) and Fe content in geological samples<sup>23</sup>

| Sample name | W(Fe <sub>2</sub> O <sub>3</sub> t)<br>/% * | Mean value of<br>LOI (%)* | Sb recovery |
|-------------|---------------------------------------------|---------------------------|-------------|
| BCR-2       | 13.77                                       | 0.27                      | 84.4%       |
| BHVO-2      | 12.39                                       | -0.05                     | 93.7%       |
| AGV-2       | 6.69                                        | 1.33                      | 82.8%       |
| GBW03104    | 5.67                                        | 4.17                      | 80.2%       |
| GSS-5       | 12.62                                       | 9.14                      | 77.8%       |
| GSS-14      | 5.32                                        | —                         | 80.6%       |
| GSD-3a      | 4.72                                        | —                         | 86.6%       |
| GSD-11      | 4.30                                        | 3.02                      | 84.8%       |
| BCR-482     | 0.11                                        | —                         | 109.6%      |
| GSB-11      | 0.07                                        | —                         | 99.7%       |
| GSP-2       | 4.90                                        | 1.18                      | 85.8%       |
| JG-2        | 0.97                                        | 1.34                      | 100.3%      |
| GBW07314    | 5.36                                        | —                         | 79.1%       |
| GBW07333    | 6.77                                        | —                         | 75.3%       |
| Nist 2702   | 11.30                                       | —                         | 96.9%       |

\* Data collected from the GeoReM website: <http://georem.mpch-mainz.gwdg.de><sup>23</sup>

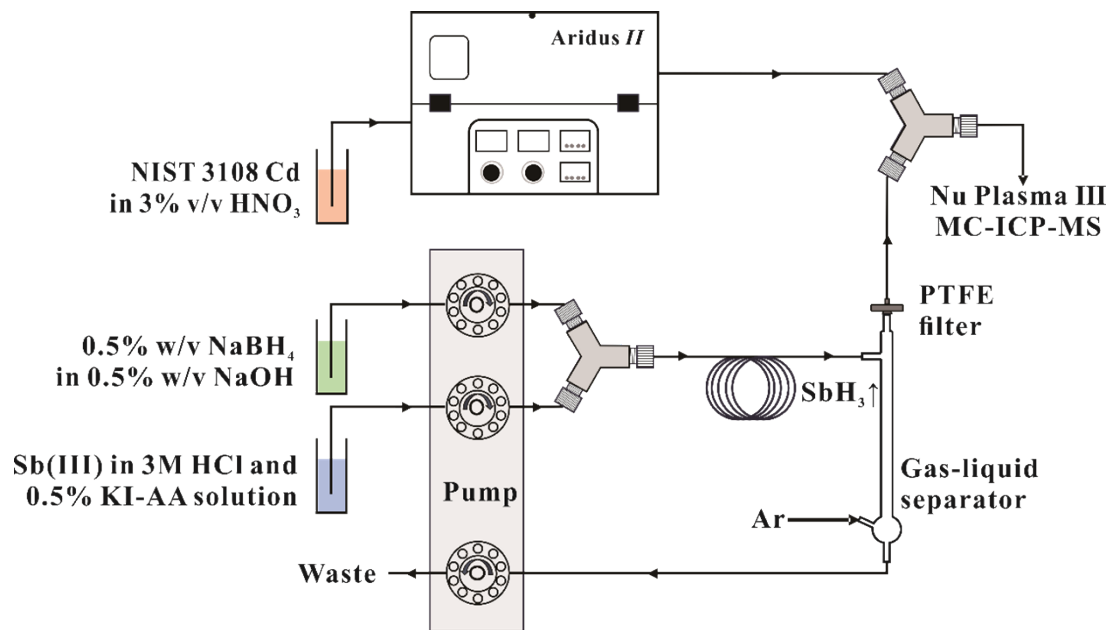

Fig. S1. A schematic diagram illustrating the connection between the hydride generator, the membrane desolvation system (Aridus II), and the MC-ICP-MS instrument (Nu Plasma III) for antimony isotope analysis. (Modified from Sun *et al.*, 2021)

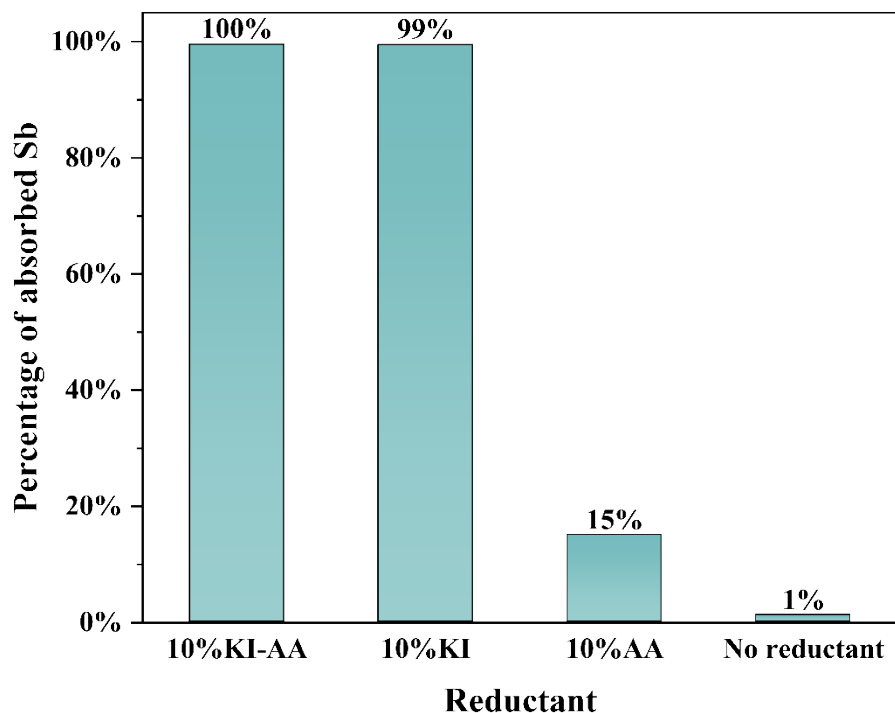

Fig. S2. Sb recovery from the 1.2 mL AG 1-X4 resin column using different reductant

Experiment condition: Four 1 mL aliquots of 2 M HCl (each containing ~1000 ng Sb and Fe) were treated separately with: (a) 110  $\mu$ L of 10% (w/v) KI-AA mixture, (b) 110  $\mu$ L of 10% (w/v) KI solution, (c) 110  $\mu$ L of 10% (w/v) AA solution, and (d) 110  $\mu$ L Milli-Q H<sub>2</sub>O. After >8 h reaction, each solutions was loaded onto a 1.2 mL AG 1-X4 resin column. Effluents from sample loading and a subsequent 10 mL rinse with 0.5 M HCl were combined. Each combined fraction then received 1 mL HNO<sub>3</sub> and 0.5 mL H<sub>2</sub>O<sub>2</sub>. Following overnight reaction, samples were degassed, refluxed at 100°C for 0.5 h, cooled, evaporated to dryness at 85°C, and reconstituted in 10 mL of 3% HNO<sub>3</sub>. Sb concentrations were quantified via ICP-MS to determine resin adsorption percentages.

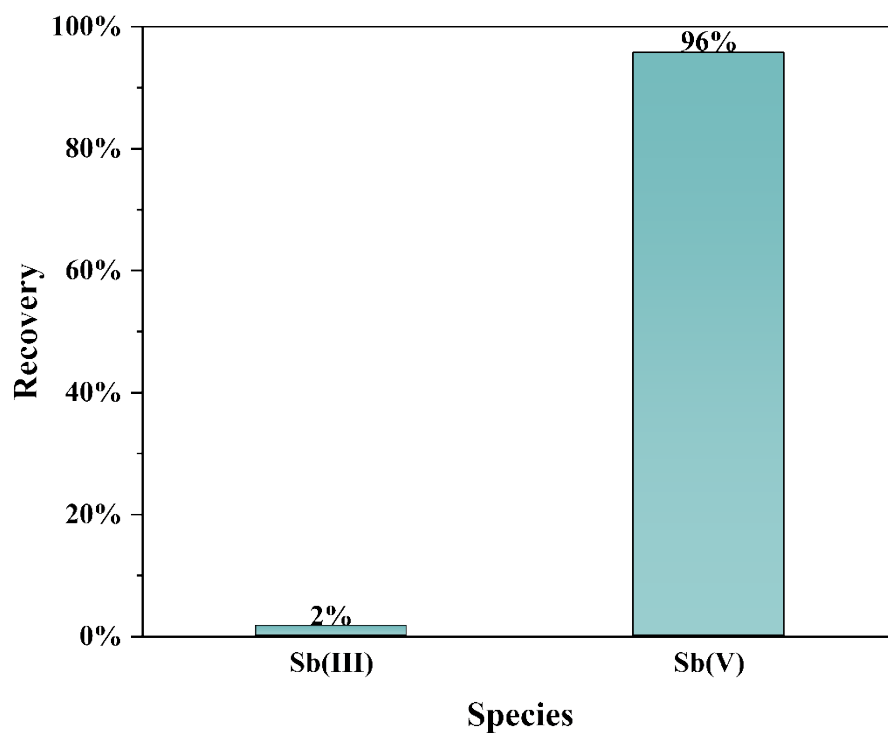

Fig. S3. Recovery of Sb(III) and Sb(V) from a 1 mL AG 50W-X8 resin column eluted with 0.1 M HNO<sub>3</sub>

Experiment condition: Solutions containing exclusively Sb(III) or Sb(V) were prepared using potassium antimonyl tartrate sesquihydrate and potassium hexahydroxidoantimonate(V), respectively. Aliquots of approximately 700 ng Sb(III) and 500 ng Sb(V) in 0.5 mL of 0.1 M HNO<sub>3</sub> matrix were loaded onto preconditioned 1 mL AG 50W-X8 resin columns, followed by rinsing with 4 mL of 0.1 M HNO<sub>3</sub>. Effluent fractions were collected and analyzed for Sb quantification.

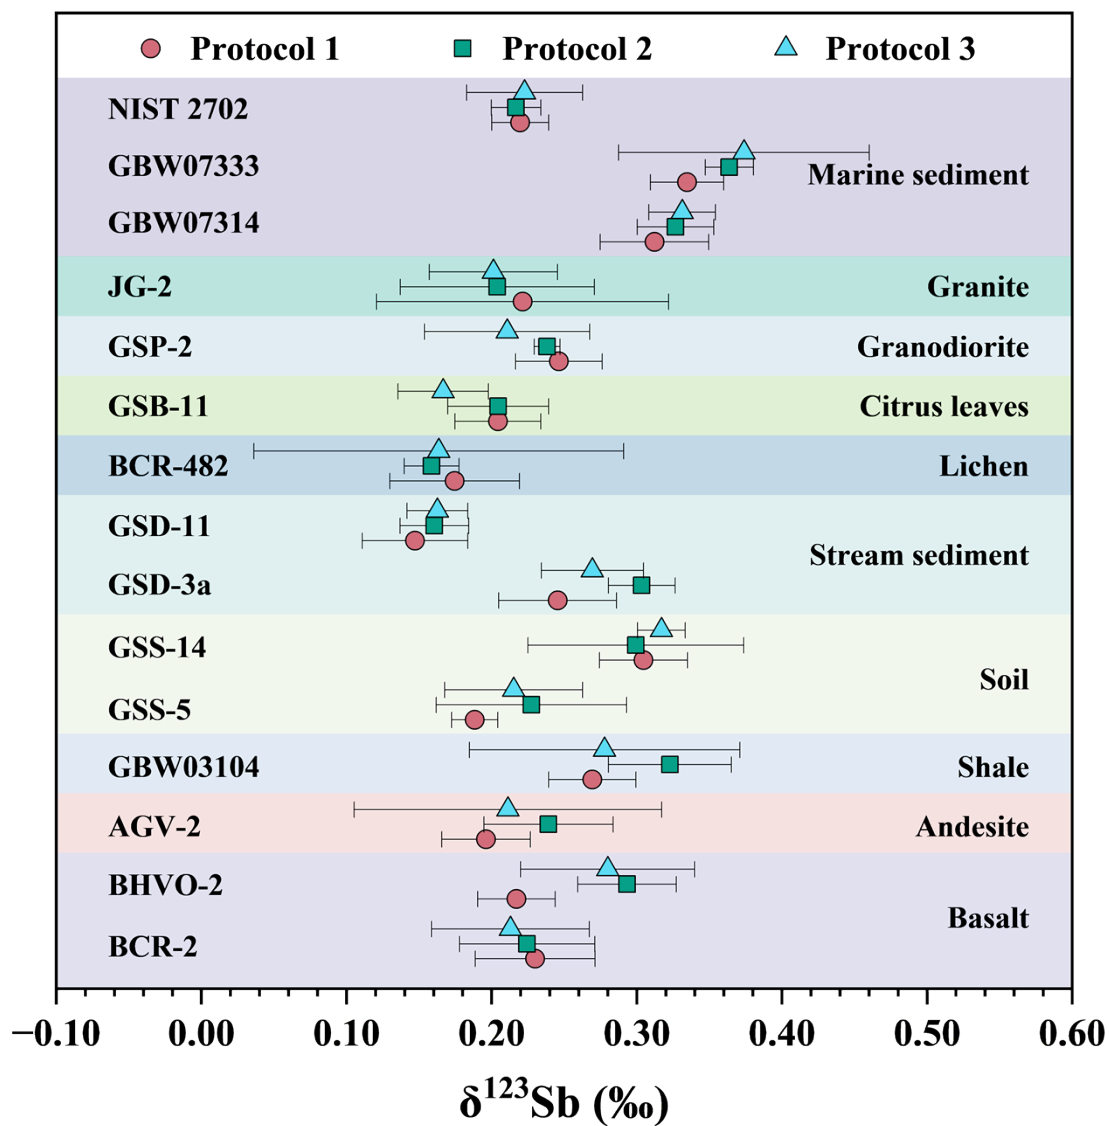

Fig. S4. Comparison of  $\delta^{123}\text{Sb}$  values in selected geological reference materials obtained using the three optimized analytical protocols. Error bars represent  $\pm 2\text{SD}$ .

## Reference

1. O. Rouxel, J. Ludden and Y. Fouquet, *Chemical Geology*, 2003, **200**, 25-40.
2. S. Asaoka, Y. Takahashi, Y. Araki and M. Tanimizu, *Analytical Sciences*, 2011, **27**, 25-28.
3. M. Tanimizu, Y. Araki, S. Asaoka and Y. Takahashi, *Geochemical Journal*, 2011, **45**, 27-32.
4. L. Lobo, V. Devulder, P. Degryse and F. Vanhaecke, *Journal of Analytical Atomic Spectrometry*, 2012, **27**, 1304-1310.
5. L. Lobo, P. Degryse, A. Shortland and F. Vanhaecke, *Journal of Analytical Atomic Spectrometry*, 2013, **28**, 1213-1219.
6. E. Resongles, R. Freydier, C. Casiot, J. Viers, J. Chmeleff and F. Elbaz-Poulichet, *Talanta*, 2015, **144**, 851-861.
7. J. Liu, J. Chen, T. Zhang, Y. Wang, W. Yuan, Y. Lang, C. Tu, L. Liu and J.-L. Birck, *Journal of Analytical Atomic Spectrometry*, 2020, **35**, 1360-1367.
8. S. Li, Y. Deng, H. Zheng, X. Liu, P. Tang, J. Zhou and Z. Zhu, *Journal of Analytical Atomic Spectrometry*, 2021, **36**, 157-164.
9. F. Colin, R. Eléonore, F. Remi and C. Corinne, *Journal of Analytical Atomic Spectrometry*, 2021, **36**, 776-785.
10. G. Sun, Y. Wu, X. Feng, X. Wu, X. Li, Q. Deng, F. Wang and X. Fu, *Chemical Geology*, 2021, **582**, 120459.
11. A. Kaufmann, M. Lazarov, S. Kiefer, J. Majzlan and S. Weyer, *Journal of Analytical Atomic Spectrometry*, 2021, **36**, 1554-1567.
12. Y. Fang, K. Chen, Z. Bao, C. Zong, H. Yuan and N. Lv, *Analytical Chemistry*, 2022, **94**, 16746-16751.
13. C. Ferrari, E. Resongles, M. Héry, A. Désoeuvre, R. Freydier, S. Delpoux, O. Bruneel and C. Casiot, *Chemical Geology*, 2023, **641**, 121788.
14. H. J. Veldhuizen, J. S. MacKinney and T. M. Johnson, *ACS Earth and Space Chemistry*, 2023, **7**, 2603-2612.
15. Y. Xia, Q. Deng, G. Sun, Y. Wu, S. Qiao, J. Ali, X. Fu and X. Feng, *Journal of Analytical Atomic Spectrometry*, 2023, **38**, 359-368.
16. S. Li, Y. Huang, Z.-Q. Chen, L. Chen, P. B. Wignall, J. Dong, X. Liu, H. Zheng, G. Wang and Z. Wei, *Earth and Planetary Science Letters*, 2024, **648**, 119096.
17. H. Zhu, J.-M. Zhu, D. Tan, Z. Lu, H. Liao and Y. Ma, *Journal of Analytical Atomic Spectrometry*, 2024, **39**, 3082-3093.
18. L. Chen, Y. Du, S. Li, X. Liu, J. Shen and Z. Zhu, *Analytical Chemistry*, 2025, **97**, 2264-2272.
19. A. Kaufmann, S. Weyer, S. Viehmann, F. Marxer, I. Horn, R. Rudnick, A. Vymazalová, S. Kiefer, J. Majzlan and M. Lazarov, *Chemical Geology*, 2025, 122959.
20. S. Li, J. Dong, L. Chen, X. Liu, Y. Yu, H. Zheng, Z. Hu and Z. Zhu, *Analytical Chemistry*, 2025, **97**, 9023-9032.
21. W. Wang, C. Li, B. Zu, J. Zhang, P. Yu, H. Ren, X. Li, L. Zhou and W. Qu, *Atomic Spectroscopy*, 2024, **45**.
22. Y. Wu, G. Sun, J.-H. Huang, H. Fan, X. Li, M. Zhou, Y. Xia and X. Feng, *Geochimica et Cosmochimica Acta*, 2024, **367**, 29-40.
23. K. P. Jochum, U. Nohl, K. Herwig, E. Lammel, B. Stoll and A. W. Hofmann, *Geostandards and Geoanalytical Research*, 2005, **29**, 333-338.
